# Supplementary material for: Controlling transferrin receptor trafficking with GPI-valence in bloodstream stage African trypanosomes
Source: PubMed Central journal article supplement (PMC5426795; doi:10.1371/journal.ppat.1006366), 2017-05-01
Supplement: ppat.1006366.s001.pdf [file ppat.1006366.s001.pdf]

## S1. E6/E7 WT vs RNAi<sup>R</sup> Sequence Alignment

|      |     |     |     |     |     |     |     |     |     |     |     |     |     |     |     |     |     |     |     |
|------|-----|-----|-----|-----|-----|-----|-----|-----|-----|-----|-----|-----|-----|-----|-----|-----|-----|-----|-----|
|      | M   | M   | K   | F   | W   | F   | V   | L   | L   | A   | L   | L   | G   | K   | E   | T   | H   | A   | 18  |
| E6WT | ATG | ATG | AAG | TTT | TGG | TTT | GTG | CTG | TTG | GCT | CTT | TTG | GGA | AAA | GAA | ACA | CAT | GCA | 54  |
| E6R  | ATG | ATG | AAA | TTC | TGG | TTC | GTC | CTC | CTC | GCG | CTC | CTT | GGG | AAG | GAG | ACT | CAC | GCG |     |
| E7WT | ATG | ATG | AAG | TTT | TGG | TTT | GTG | CTG | TTG | GCT | CTT | TTG | GGA | AAA | GAA | ACA | CAT | GCA |     |
| E7R  | ATG | ATG | AAA | TTC | TGG | TTC | GTC | CTC | CTC | GCG | CTC | CTT | GGG | AAG | GAG | ACT | CAC | GCG |     |
|      | M   | M   | K   | F   | W   | F   | V   | L   | L   | A   | L   | L   | G   | K   | E   | T   | H   | A   |     |
|      | Y   | Y   | E   | N   | K   | R   | N   | A   | L   | N   | A   | T   | A   | A   | N   | K   | V   | C   | 36  |
| E6WT | TAT | TAT | GAA | AAT | AAA | AGG | AAT | GCA | TTA | AAT | GCA | ACC | GCC | GCT | AAT | AAA | GTG | TGT | 108 |
| E6R  | TAC | TAC | GAG | AAC | AAG | CGA | AAC | GCG | CTC | AAC | GCG | ACT | GCG | GCG | AAC | AAG | GTT | TGC |     |
| E7WT | TAT | TAT | GAA | AAT | AAA | AGG | AAT | GCA | TTA | AAT | GCA | ACC | GCC | GCT | AAT | AAA | GTG | TGT |     |
| E7R  | TAC | TAC | GAG | AAC | AAG | CGA | AAC | GCG | CTC | AAC | GCG | ACT | GCG | GCG | AAC | AAG | GTT | TGC |     |
|      | Y   | Y   | E   | N   | K   | R   | N   | A   | L   | N   | A   | T   | A   | A   | N   | K   | V   | C   |     |
|      | G   | L   | S   | T   | Y   | L   | K   | G   | I   | A   | H   | R   | V   | N   | S   | E   | S   | A   | 54  |
| E6WT | GGG | CTA | TCG | ACC | TAT | CTT | AAA | GGA | ATA | GCG | CAC | AGA | GTA | AAC | AGC | GAG | AGT | GCC | 162 |
| E6R  | GGA | TTG | AGC | ACT | TAC | TTG | AAG | GGG | ATC | GCA | CAT | CGG | GTC | AAT | TCA | GAA | TCA | GCT |     |
| E7WT | GGG | CTA | TCG | ACC | TAT | CTT | AAA | GGA | ATA | GCG | CAC | AGA | GTA | AAC | AGC | GAG | AGT | GCC |     |
| E7R  | GGA | TTG | AGC | ACT | TAC | TTG | AAG | GGG | ATC | GCA | CAT | CGG | GTC | AAT | TCA | GAA | TCA | GCT |     |
|      | G   | L   | S   | T   | Y   | L   | K   | G   | I   | A   | H   | R   | V   | N   | S   | E   | S   | A   |     |
|      | V   | V   | T   | E   | K   | L   | S   | D   | L   | K   | M   | R   | S   | I   | Q   | L   | Q   | L   | 72  |
| E6WT | GTG | GTT | ACG | GAA | AAA | CTA | TCA | GAT | TTG | AAA | ATG | AGA | AGC | ATC | CAG | TTG | CAG | TTA | 216 |
| E6R  | GTT | GTC | ACA | GAG | AAG | TTG | AGC | GAC | CTC | AAG | ATG | CGA | TCA | ATT | CAA | CTC | CAA | CTC |     |
| E7WT | GTG | GTT | ACG | GAA | AAA | CTA | TCA | GAT | TTG | AAA | ATG | AGA | AGC | ATC | CAG | TTG | CAG | TTA |     |
| E7R  | GTT | GTC | ACA | GAG | AAG | TTG | AGC | GAC | CTC | AAG | ATG | CGA | TCA | ATT | CAA | CTC | CAA | CTC |     |
|      | V   | V   | T   | E   | K   | L   | S   | D   | L   | K   | M   | R   | S   | I   | Q   | L   | Q   | L   |     |
|      | S   | V   | M   | R   | N   | R   | V   | P   | S   | G   | E   | Q   | D   | C   | K   | D   | I   | R   | 90  |
| E6WT | TCA | GTA | ATG | CGG | AAC | AGA | GTG | CCT | TCT | GGC | GAG | CAG | GAT | TGT | AAA | GAC | ATC | AGG | 270 |
| E6R  | AGC | GTC | ATG | AGG | AAT | CGG | GTT | CCC | AGC | GGT | GAA | CAA | GAC | TGC | AAG | GAT | ATT | CGA |     |
| E7WT | TCA | GTA | ATG | CGG | AAC | AGA | GTG | CCT | TCT | GGC | GAG | CAG | GAT | TGT | AAA | GAC | ATC | AGG |     |
| E7R  | AGC | GTC | ATG | AGG | AAT | CGG | GTT | CCC | AGC | GGT | GAA | CAA | GAC | TGC | AAG | GAT | ATT | CGA |     |
|      | S   | V   | M   | R   | N   | R   | V   | P   | S   | G   | E   | Q   | D   | C   | K   | D   | I   | R   |     |
|      | T   | L   | L   | K   | T   | V   | L   | R   | N   | E   | F   | T   | F   | Q   | Q   | E   | L   | E   | 108 |
| E6WT | ACA | CTC | TTG | AAA | ACA | GTA | TTG | AGG | AAT | GAG | TTT | ACA | TTC | CAG | CAG | GAG | TTG | GAG | 324 |
| E6R  | ACG | TTG | CTC | AAG | ACC | GTC | CTC | CGA | AAC | GAA | TTT | ACC | TTT | CAA | CAA | GAA | CTC | GAA |     |
| E7WT | ACA | CTC | TTG | AAA | ACA | GTA | TTG | AGG | AAT | GAG | TTT | ACA | TTC | CAG | CAG | GAG | TTG | GAG |     |
| E7R  | ACG | TTG | CTC | AAG | ACC | GTC | CTC | CGA | AAC | GAA | TTT | ACC | TTT | CAA | CAA | GAA | CTC | GAA |     |
|      | T   | L   | L   | K   | T   | V   | L   | R   | N   | E   | F   | T   | F   | Q   | Q   | E   | L   | E   |     |
|      | E   | M   | R   | N   | A   | S   | A   | L   | A   | A   | A   | A   | A   | G   | I   | A   | A   | G   | 126 |
| E6WT | GAA | ATG | AGG | AAC | GCA | TCC | GCG | TTA | GCA | GCA | GCT | GCA | GCT | GGG | ATA | GCA | GCT | GGA | 378 |
| E6R  | GAG | ATG | CGA | AAT | GCG | AGT | GCA | CTC | GCG | GCT | GCC | GCG | GCC | GGA | ATC | GCG | GCC | GGG |     |
| E7WT | GAA | ATG | AGG | AAC | GCA | TCC | GCG | TTA | GCA | GCA | GCT | GCA | GCT | GGG | ATA | GCA | GCT | GGA |     |
| E7R  | GAG | ATG | CGA | AAT | GCG | AGT | GCA | CTC | GCG | GCT | GCC | GCG | GCC | GGA | ATC | GCG | GCC | GGG |     |
|      | E   | M   | R   | N   | A   | S   | A   | L   | A   | A   | A   | A   | A   | G   | I   | A   | A   | G   |     |
|      | R   | L   | E   | E   | W   | I   | F   | V   | F   | A   | Q   | A   | A   | G   | G   | S   | S   | Q   | 144 |
| E6WT | AGA | CTG | GAA | GAG | TGG | ATT | TTT | GTA | TTT | GCA | CAG | GCA | GCA | GGC | GGG | TCA | TCA | CAG | 432 |
| E6R  | CGG | CTC | GAA | GAA | TGG | ATC | TTT | GTC | TTT | GCG | CAA | GCG | GCG | GGT | GGA | AGC | AGC | CAA |     |
| E7WT | AGA | CTG | GAA | GAG | TGG | ATT | TTT | GTA | TTT | GCA | CAG | GCA | GCA | GGC | GGG | TCA | TCA | CAG |     |
| E7R  | CGG | CTC | GAA | GAA | TGG | ATC | TTT | GTC | TTT | GCG | CAA | GCG | GCG | GGT | GGA | AGC | AGC | CAA |     |
|      | R   | L   | E   | E   | W   | I   | F   | V   | F   | A   | Q   | A   | A   | G   | G   | S   | S   | Q   |     |
|      | F   | C   | I   | S   | V   | G   | T   | N   | I   | P   | A   | E   | Y   | N   | N   | L   | Q   | E   | 162 |
| E6WT | TTT | TGC | ATA | AGC | GTA | GGG | ACG | AAT | ATC | CCA | GCA | GAA | TAC | AAC | AAC | TTG | CAA | GAA | 486 |
| E6R  | TTT | TGT | ATC | TCA | GTC | GGA | ACA | AAC | ATT | CCG | GCG | GAG | TAT | AAT | AAT | CTC | CAG | GAG |     |
| E7WT | TTT | TGC | ATA | AGC | GTA | GGG | ACG | AAT | ATC | CCA | GCA | GAA | TAC | AAC | AAC | TTG | CAA | GAA |     |
| E7R  | TTT | TGT | ATC | TCA | GTC | GGA | ACA | AAC | ATT | CCG | GCG | GAG | TAT | AAT | AAT | CTC | CAG | GAG |     |
|      | F   | C   | I   | S   | V   | G   | T   | N   | I   | P   | A   | E   | Y   | N   | N   | L   | Q   | E   |     |

|      |     |     |     |     |     |     |     |     |     |     |     |     |     |     |     |     |     |     |      |
|------|-----|-----|-----|-----|-----|-----|-----|-----|-----|-----|-----|-----|-----|-----|-----|-----|-----|-----|------|
|      | C   | F   | D   | G   | I   | I   | G   | P   | E   | T   | L   | Y   | K   | I   | E   | D   | S   | R   | 180  |
| E6WT | TGT | TTT | GAT | GGA | ATA | ATT | GGA | CCT | GAA | ACC | CTT | TAC | AAA | ATT | GAG | GAT | TCA | CGT | 540  |
| E6R  | TGC | TTC | GAC | GGC | ATC | ATC | GGA | CCC | GAG | ACT | TTG | TAT | AAG | ATC | GAA | GAC | AGC | CGC |      |
| E7WT | TGT | TTT | GAT | GGA | ATA | ATT | GGA | CCT | GAA | ACC | CTT | TAC | AAA | ATT | GAG | GAT | TCA | CGT |      |
| E7R  | TGC | TTC | GAC | GGC | ATC | ATC | GGA | CCC | GAG | ACT | TTG | TAT | AAG | ATC | GAA | GAC | AGC | CGC |      |
|      | C   | F   | D   | G   | I   | I   | G   | P   | E   | T   | L   | Y   | K   | I   | E   | D   | S   | R   |      |
|      | V   | K   | E   | S   | A   | Q   | K   | S   | L   | Q   | L   | H   | E   | V   | L   | S   | S   | I   | 198  |
| E6WT | GTA | AAA | GAG | TCG | GCG | CAG | AAA | AGC | TTG | CAA | CTC | CAT | GAA | GTG | TTA | TCA | TCC | ATT | 594  |
| E6R  | GTC | AAG | GAA | AGC | GCA | CAA | AAG | TCA | CTC | CAG | TTG | CAC | GAG | GTT | CTC | AGC | AGT | ATC |      |
| E7WT | GTA | AAA | GAG | TCG | GCG | CAG | AAA | AGC | TTG | CAA | CTC | CAT | GAA | GTG | TTA | TCA | TCC | ATT |      |
| E7R  | GTC | AAG | GAA | AGC | GCA | CAA | AAG | TCA | CTC | CAG | TTG | CAC | GAG | GTT | CTC | AGC | AGT | ATC |      |
|      | V   | K   | E   | S   | A   | Q   | K   | S   | L   | Q   | L   | H   | E   | V   | L   | S   | S   | I   |      |
|      | S   | F   | N   | S   | L   | G   | A   | E   | N   | I   | R   | G   | G   | N   | G   | R   | D   | G   | 216  |
| E6WT | TCC | TTC | AAT | AGC | TTG | GGT | GCG | GAA | AAT | ATC | CGA | GGA | GGA | AAT | GGG | AGG | GAT | GGA | 648  |
| E6R  | AGT | TTT | AAC | TCA | CTC | GGC | GCA | GAG | AAC | ATT | AGG | GGC | GGC | AAC | GGA | CGA | GAC | GGC |      |
| E7WT | TCC | TTC | AGT | AGC | TTG | GGT | GCG | GAA | AGT | ATT | GTT | GAG | CAA | CGA | AAG | AAC | AGA | GGA |      |
| E7R  | AGT | TTT | TCA | TCA | CTC | GGC | GCA | GAG | TCA | ATC | GTG | GAA | CAG | AGG | AAA | AAT | CGG | GGC |      |
|      | S   | F   | S   | S   | L   | G   | A   | E   | S   | I   | V   | E   | Q   | R   | K   | N   | R   | G   |      |
|      | C   | N   | L   | V   | R   | T   | D   | T   | D   | G   | V   | L   | E   | G   | G   | S   | V   | R   | 234  |
| E6WT | TGT | AAT | TTG | GTG | AGA | ACA | GAT | ACT | GAC | GGT | GTA | TTG | GAA | GGG | GGG | TCG | GTG | AGA | 702  |
| E6R  | TGC | AAC | CTC | GTC | AGG | ACA | GAC | ACC | GAT | GGC | GTC | CTC | GAA | GGA | GGA | AGC | GTC | CGG |      |
| E7WT | TGT | AAC | CTA | ATG | CGG | ACG | GCT | GAC | GGA | GGT | TTG | CTG | AAA | GAT | ATT | TGT | TTG | AAT |      |
| E7R  | TGC | AAT | TTG | ATG | AGG | ACA | GCC | GAT | GGC | GGC | CTC | CTC | AAG | GAC | ATC | TGC | CTC | AAC |      |
|      | C   | N   | L   | M   | R   | T   | A   | D   | G   | G   | L   | L   | K   | D   | I   | C   | L   | N   |      |
|      | R   | H   | N   | L   | T   | W   | G   | G   | G   | V   | M   | N   | F   | G   | S   | Y   | Q   | N   | 252  |
| E6WT | CGG | CAC | AAC | TTA | ACG | TGG | GGT | GGT | GGA | GTG | ATG | AAT | TTT | GGA | TCC | TAT | CAA | AAC | 756  |
| E6R  | AGG | CAT | AAT | CTC | ACG | TGG | GGC | GGC | GGC | GTT | ATG | AAC | TTT | GGA | TCC | ... | ... | ... |      |
| E7WT | TGC | --- | AAC | TTC | ACA | TGG | GGT | GGT | GGA | GTG | ATG | AAT | TTC | GGA | TCC | TGT | GTG | GCG |      |
| E7R  | TGT | --- | AAT | TTT | ACG | TGG | GGC | GGC | GGC | GTT | ATG | AAC | TTT | GGA | TCC | ... | ... | ... |      |
|      | C   | -   | N   | F   | T   | W   | G   | G   | G   | V   | M   | N   | F   | G   | S   | C   | V   | A   |      |
|      | G   | S   | M   | Y   | V   | E   | G   | G   | E   | Y   | G   | D   | A   | T   | E   | Y   | G   | A   | 270  |
| E6WT | GGA | AGT | ATG | TAC | GTT | GAG | GGT | GGT | GAA | TAC | GGT | GAT | GCT | ACA | GAG | TAC | GGT | GCA | 810  |
| E7WT | GGG | AAC | CTA | AAA | ATA | AAA | GGG | GGA | GAA | TAC | GGT | GAT | GTC | AGT | TCT | CAC | GAT | GTG |      |
|      | G   | N   | L   | K   | I   | K   | G   | G   | E   | Y   | G   | D   | V   | S   | S   | H   | D   | V   |      |
|      | V   | R   | W   | T   | E   | D   | P   | S   | K   | V   | S   | I   | F   | K   | D   | V   | I   | R   | 288  |
| E6WT | GTA | CGG | TGG | ACC | GAA | GAT | CCC | AGT | AAA | GTG | AGC | ATA | TTT | AAG | GAT | GTC | ATC | CGC | 864  |
| E7WT | GTA | CGG | TGG | ACC | GAA | GAT | CCC | AGT | AAA | GTG | AGC | ATA | TTT | AAG | GAT | GTC | ATC | CGC |      |
|      | V   | R   | W   | T   | E   | D   | P   | S   | K   | V   | S   | I   | F   | K   | D   | V   | I   | R   |      |
|      | L   | F   | A   | R   | F   | Q   | E   | A   | K   | N   | E   | V   | M   | N   | K   | I   | K   | T   | 306  |
| E6WT | CTG | TTT | GCG | CGC | TTC | CAA | GAA | GCA | AAA | AAT | GAA | GTG | ATG | AAT | AAA | ATA | AAA | ACT | 918  |
| E7WT | CTG | TTT | GCG | CGC | TTC | CAA | GAA | GCA | AAA | AAT | GCA | GTG | ATG | AAT | AAA | ATA | AAA | ACT |      |
|      | L   | F   | A   | R   | F   | Q   | E   | A   | K   | N   | A   | V   | M   | N   | K   | I   | K   | T   |      |
|      | T   | V   | D   | E   | L   | A   | K   | C   | I   | G   | Q   | K   | E   | V   | E   | L   | T   | D   | 324  |
| E6WT | ACT | GTG | GAT | GAA | TTG | GCG | AAA | TGC | ATA | GGG | CAG | AAA | GAG | GTT | GAG | CTC | ACT | GAT | 972  |
| E7WT | ACT | GTG | GAT | GAA | TTG | GCG | AAA | TGC | ATA | GGG | CAG | AAA | GAG | GTT | GAG | CTC | ACT | AAT |      |
|      | T   | V   | D   | E   | L   | A   | K   | C   | I   | G   | Q   | K   | E   | V   | E   | L   | T   | N   |      |
|      | D   | Q   | L   | Y   | E   | E   | F   | I   | W   | E   | T   | I   | H   | R   | L   | E   | L   | S   | 342  |
| E6WT | GAT | CAG | CTT | TAC | GAG | GAA | TTT | ATC | TGG | GAG | ACC | ATA | CAC | AGA | TTG | GAG | CTG | TCA | 1026 |
| E7WT | GAT | CAG | CTT | TAC | GAA | GAA | TTC | GAG | GCA | ATA | CAA | AAG | TAC | CTA | GGG | TCT | CTG | tga |      |
|      | D   | Q   | L   | Y   | E   | E   | F   | E   | A   | I   | Q   | K   | Y   | L   | G   | S   | L   |     |      |
|      | K   | R   | V   | S   | E   | Q   | L   | S   | L   | G   | E   | E   | E   | E   | T   | I   | L   | K   | 360  |
| E6WT | AAG | AGA | GTG | AGT | GAA | CAA | CTC | TCT | TTA | GGT | GAA | GAA | GAG | GAG | ACG | ATC | CTG | AAA | 1080 |
